# Supplementary material
Source: PubMed Central journal article supplement (PMC3225917)
Supplement: NIHMS329335-supplement-Support_Doc.pdf [file NIHMS329335-supplement-Support_Doc.pdf]

**Supplemental Table 1.** Baseline characteristics of study subjects stratified by GH status (n=76). Data are presented as mean  $\pm$  SEM. Relative GH Deficiency determined as peak stimulated GH  $\leq 4.2$   $\mu\text{g/l}$  on GHRH-arginine stimulation test.

|                              | Normal Weight     | Obese GHS         | Obese GHD          | <i>P</i> |
|------------------------------|-------------------|-------------------|--------------------|----------|
| N                            | 26                | 31                | 19                 |          |
| Age                          | 43.4 $\pm$ 1.9    | 41.1 $\pm$ 2.2    | 45.2 $\pm$ 1.2     | 0.38     |
| Race                         |                   |                   |                    | 0.29     |
| Caucasian                    | 18 (69 %)         | 18 (58 %)         | 15 (79 %)          |          |
| Non-Caucasian                | 8 (31 %)          | 13 (42 %)         | 4 (21 %)           |          |
| Ethnicity                    |                   |                   |                    | 0.18     |
| Hispanic                     | 1 (4 %)           | 3 (10 %)          | 4 (21 %)           |          |
| Non-Hispanic                 | 25 (96 %)         | 28 (90 %)         | 15 (79 %)          |          |
| Tobacco use (pack years)     | 5.9 $\pm$ 2.2     | 9.5 $\pm$ 3.0     | 2.2 $\pm$ 1.1      | 0.16     |
| Blood Pressure               |                   |                   |                    |          |
| Systolic BP (mmHg)           | 121 $\pm$ 2       | 126 $\pm$ 3       | 128 $\pm$ 3        | 0.14     |
| Diastolic BP (mm Hg)         | 76 $\pm$ 2        | 78 $\pm$ 2        | 83 $\pm$ 2*        | 0.04     |
| Anthropometrics              |                   |                   |                    |          |
| BMI (kg/m <sup>2</sup> )     | 22.5 $\pm$ 0.3    | 35.1 $\pm$ 0.8*   | 37.7 $\pm$ 1.0*    | <0.0001  |
| VAT (cm <sup>2</sup> )       | 57 $\pm$ 9        | 195 $\pm$ 16*     | 240 $\pm$ 15*      | <0.0001  |
| SAT (cm <sup>2</sup> )       | 104 $\pm$ 11      | 396 $\pm$ 27*     | 477 $\pm$ 33*      | <0.0001  |
| Metabolic Assessment         |                   |                   |                    |          |
| Total Cholesterol (mmol/l)   | 4.73 $\pm$ 0.19   | 4.81 $\pm$ 0.16   | 4.78 $\pm$ 0.20    | 0.95     |
| Triglyceride (mmol/l)        | 0.87 $\pm$ 0.10   | 1.38 $\pm$ 0.17   | 1.76 $\pm$ 0.24*   | 0.0003   |
| HDL Chol (mmol/l)            | 1.53 $\pm$ 0.09   | 1.12 $\pm$ 0.05*  | 1.01 $\pm$ 0.04*   | <0.0001  |
| LDL Chol (mmol/l)            | 2.76 $\pm$ 0.15   | 3.11 $\pm$ 0.16   | 3.18 $\pm$ 0.18    | 0.17     |
| Fasting Glucose (mmol/l)     | 4.70 $\pm$ 0.08   | 5.44 $\pm$ 0.30   | 5.18 $\pm$ 0.27    | 0.08     |
| Fasting Insulin (pmol/l)     | 19.9 $\pm$ 3.2    | 60.5 $\pm$ 8.4*   | 69.6 $\pm$ 10.4*   | <0.0001  |
| Hormonal Assessment          |                   |                   |                    |          |
| Basal GH ( $\mu\text{g/l}$ ) | 0.7 $\pm$ 0.2     | 0.3 $\pm$ 0.1     | 0.1 $\pm$ 0.05     | 0.07     |
| Peak GH ( $\mu\text{g/l}$ )  | 36.4 $\pm$ 3.9    | 7.8 $\pm$ 0.7*    | 2.7 $\pm$ 0.2*     | <0.0001  |
| IGF-1 (nmol/l)               | 12.0 $\pm$ 0.6    | 11.8 $\pm$ 0.8    | 8.7 $\pm$ 0.6*†    | 0.007    |
| Total Testosterone (nmol/l)  | 18.6 $\pm$ 1.2    | 14.6 $\pm$ 1.2*   | 11.0 $\pm$ 1.2*    | 0.0005   |
| Free Testosterone (nmol/l)   | 0.56 $\pm$ 0.03   | 0.44 $\pm$ 0.04*  | 0.34 $\pm$ 0.03*   | 0.0004   |
| SHBG (nmol/l)                | 45.3 $\pm$ 3.6    | 31.6 $\pm$ 4.6*   | 26.3 $\pm$ 3.5*    | 0.008    |
| Estradiol (pmol/l)           | 102 $\pm$ 5       | 121 $\pm$ 11      | 111 $\pm$ 5        | 0.25     |
| LH (IU/l)                    | 4.5 $\pm$ 0.4     | 4.4 $\pm$ 0.8     | 3.3 $\pm$ 0.4      | 0.39     |
| FSH (IU/l)                   | 6.0 $\pm$ 0.8     | 6.4 $\pm$ 1.2     | 4.5 $\pm$ 0.8      | 0.46     |
| Carotid IMT (mm)             | 0.658 $\pm$ 0.028 | 0.750 $\pm$ 0.032 | 0.777 $\pm$ 0.041* | 0.04     |

\* indicates significantly different from normal weight by Tukey-Kramer post-hoc test for significant ANOVA.

† indicates significantly different from Obese GHS by Tukey-Kramer post-hoc test for significant ANOVA.

**Supplemental Table 2.** Baseline characteristics of study subjects stratified by free testosterone status (n=76). Data are presented as mean  $\pm$  SEM. Relative hypogonadism of obesity is determined as fasting free testosterone  $<0.31$  nmol/l (9 ng/dl).

|                             | Normal Weight     | Obese Eugonadal   | Obese Hypogonadal  | <i>P</i> |
|-----------------------------|-------------------|-------------------|--------------------|----------|
| N                           | 26                | 36                | 14                 |          |
| Age                         | 43.4 $\pm$ 1.9    | 41.7 $\pm$ 1.8    | 45.2 $\pm$ 2.3     | 0.52     |
| Race                        |                   |                   |                    | 0.69     |
| Caucasian                   | 18 (69 %)         | 25 (69 %)         | 8 (57 %)           |          |
| Non-Caucasian               | 8 (31 %)          | 11 (31 %)         | 6 (43 %)           |          |
| Ethnicity                   |                   |                   |                    | 0.34     |
| Hispanic                    | 1 (4 %)           | 5 (14 %)          | 2 (14 %)           |          |
| Non-Hispanic                | 25 (96 %)         | 31 (86 %)         | 12 (86 %)          |          |
| Tobacco use (pack years)    | 5.9 $\pm$ 2.2     | 5.9 $\pm$ 2.2     | 9.0 $\pm$ 4.5      | 0.72     |
| Blood Pressure              |                   |                   |                    |          |
| Systolic BP (mmHg)          | 121 $\pm$ 2       | 126 $\pm$ 2       | 129 $\pm$ 3        | 0.12     |
| Diastolic BP (mm Hg)        | 76 $\pm$ 2        | 79 $\pm$ 2        | 84 $\pm$ 2         | 0.06     |
| Anthropometrics             |                   |                   |                    |          |
| BMI (kg/m <sup>2</sup> )    | 22.5 $\pm$ 0.3    | 35.6 $\pm$ 0.8*   | 37.4 $\pm$ 1.3*    | <0.0001  |
| VAT (cm <sup>2</sup> )      | 57 $\pm$ 9        | 202 $\pm$ 13*     | 239 $\pm$ 22*      | <0.0001  |
| SAT (cm <sup>2</sup> )      | 104 $\pm$ 11      | 411 $\pm$ 23*     | 468 $\pm$ 49*      | <0.0001  |
| Metabolic Assessment        |                   |                   |                    |          |
| Total Cholesterol (mmol/l)  | 4.73 $\pm$ 0.19   | 4.84 $\pm$ 0.14   | 4.68 $\pm$ 0.25    | 0.83     |
| Triglyceride (mmol/l)       | 0.87 $\pm$ 0.10   | 1.33 $\pm$ 0.11*  | 2.01 $\pm$ 0.39*†  | 0.0004   |
| HDL Chol (mmol/l)           | 1.53 $\pm$ 0.09   | 1.14 $\pm$ 0.04*  | 0.94 $\pm$ 0.04*   | <0.0001  |
| LDL Chol (mmol/l)           | 2.76 $\pm$ 0.15   | 3.16 $\pm$ 0.13   | 3.08 $\pm$ 0.28    | 0.17     |
| Fasting Glucose (mmol/l)    | 4.70 $\pm$ 0.08   | 5.13 $\pm$ 0.17   | 5.90 $\pm$ 0.60*   | 0.01     |
| Fasting Insulin (pmol/l)    | 19.9 $\pm$ 3.2    | 53.5 $\pm$ 6.0*   | 90.8 $\pm$ 15.5*†  | <0.0001  |
| Hormonal Assessment         |                   |                   |                    |          |
| Basal GH ( $\mu$ g/l)       | 0.7 $\pm$ 0.2     | 0.3 $\pm$ 0.1     | 0.2 $\pm$ 0.1      | 0.08     |
| Peak GH ( $\mu$ g/l)        | 36.4 $\pm$ 3.9    | 6.1 $\pm$ 0.7*    | 5.2 $\pm$ 1.2*     | <0.0001  |
| IGF-1 (nmol/l)              | 12.0 $\pm$ 0.6    | 11.1 $\pm$ 0.8    | 9.4 $\pm$ 0.7      | 0.13     |
| Total Testosterone (nmol/l) | 18.6 $\pm$ 1.2    | 15.6 $\pm$ 0.9    | 7.1 $\pm$ 0.9*     | <0.0001  |
| Free Testosterone (nmol/l)  | 0.56 $\pm$ 0.03   | 0.49 $\pm$ 0.02   | 0.19 $\pm$ 0.02*   | <0.0001  |
| SHBG (nmol/l)               | 45.3 $\pm$ 3.6    | 32.6 $\pm$ 4.1    | 22.0 $\pm$ 2.8*    | 0.003    |
| Estradiol (pmol/l)          | 102 $\pm$ 5       | 123 $\pm$ 9       | 102 $\pm$ 8        | 0.11     |
| LH (IU/l)                   | 4.5 $\pm$ 0.4     | 3.9 $\pm$ 0.2     | 4.1 $\pm$ 1.7      | 0.77     |
| FSH (IU/l)                  | 6.0 $\pm$ 0.7     | 5.0 $\pm$ 0.6     | 7.3 $\pm$ 2.5      | 0.36     |
| Carotid IMT (mm)            | 0.658 $\pm$ 0.028 | 0.744 $\pm$ 0.027 | 0.801 $\pm$ 0.054* | 0.02     |

\* indicates significantly different from Normal Weight by Tukey-Kramer post-hoc test for significant ANOVA.

† indicates significantly different from Obese Eugonadal by Tukey-Kramer post-hoc test for significant ANOVA.
